# Supplementary material for: A systematic review of the safety and efficacy of artemether-lumefantrine against uncomplicated Plasmodium falciparum malaria during pregnancy
Source: Springer Nature journal article supplement (doi:10.1186/1475-2875-11-141), 2012-05-01

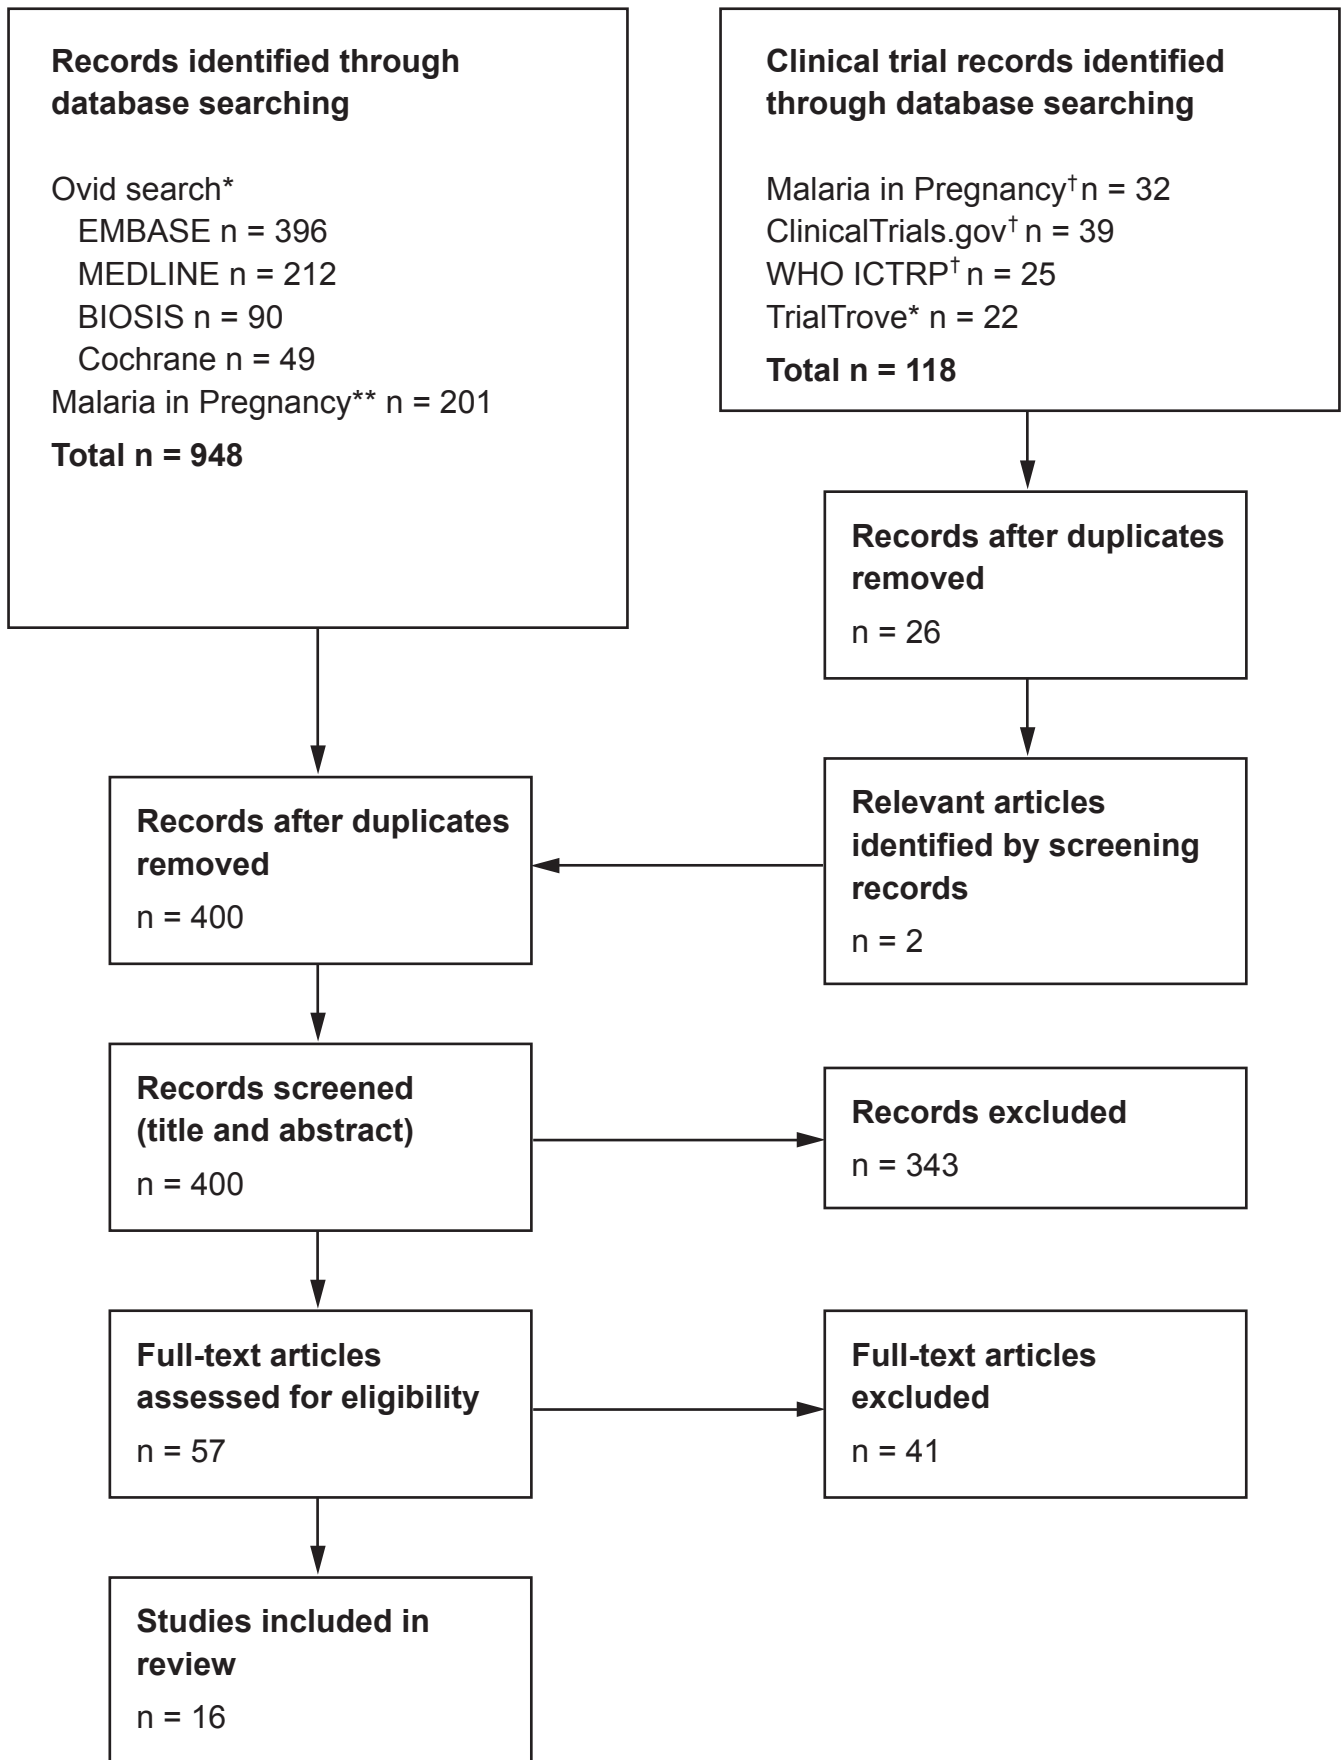

Supplement: 12936_2011_2112_MOESM5_ESM.pdf [file 12936_2011_2112_MOESM5_ESM.pdf]
